# Supplementary material for: Photodimerization of chromone
Source: Royal Society of Chemistry journal article supplement (doi:10.1039/b822829a), 2009-01-01
Supplement: b822829a.pdf [file b822829a.pdf]

## *Supplementary Information*

### Photodimerization of Chromone

Masami Sakamoto,\* Masayuki Kanehiro, Takashi Mino, and Tsutomu Fujita

Department of Applied Chemistry and Biotechnology, Graduate School of Engineering, Chiba

University, Yayoi-cho, Inage-ku, Chiba 263-8522, Japan

E-mail sakamotom@faculty.chiba-u.jp

#### **Experimental**

General. NMR spectra were recorded on CDCl<sub>3</sub> solutions on a BRUKER 300 operating 300 MHz, respectively, for <sup>1</sup>H- and <sup>13</sup>C-NMR spectroscopy. Chemical shifts are reported in parts per million (ppm) relative to TMS as internal standards. IR spectra were recorded on a JASCO FT/IR-230 spectrometer as KBr disks. UV-VIS spectra were recorded on a JASCO V-650, and fluorescence spectra were recorded on a JASCO FP-6200DS spectrometer. Eikosya 500 W high pressure mercury lamp was used as the irradiation source. An uranyl glass filter was used for isolation of 365 nm line. Chromone **1** used for photochemical reaction was purified by recrystallization of the commercially available material from CHCl<sub>3</sub>-hexane twice.

#### **General procedure for the photoreaction of chromone 1**

A benzene solution containing chromone at various concentrations was irradiated with a 500-W high pressure mercury lamp under argon atmosphere. After removing the solvent in *vacuo*, the crude photolysate was subjected to chromatography on silica gel. Two photodimers, **2** and **3**, were obtained as sole products.

Spectral data of *cis-cis-anti* head-to-tail photodimer **2**.

Mp. 223.5-224.5°C; IR (cm<sup>-1</sup>, KBr) 1604, 1670; <sup>1</sup>H-NMR: (CDCl<sub>3</sub>) δ 3.89 (dd, *J* = 4.8 and 6.9 Hz, 2H), 5.42 (dd, *J* = 4.8 and 6.9 Hz, 2H), 7.02 (dd, *J* = 1.0 and 8.3 Hz, 2H), 7.09 (ddd, *J* = 1.0, 7.3 and 7.8 Hz, 2H), 7.55 (ddd, *J* = 1.7, 7.3 and 8.3 Hz, 2H), 7.92 (dd, *J* = 1.7 and 7.8 Hz, 2H); <sup>13</sup>C-NMR

(CDCl<sub>3</sub>)  $\delta$  51.4, 74.9, 118.8, 119.2, 122.3, 127.2, 137.1, 159.5, 188.6; EI-MS  $m/z$  292 (M<sup>+</sup>).

Spectral data of *cis-trans* head-to-tail photodimer **3**.

Mp. 173.5-174.2°C; IR (cm<sup>-1</sup>, KBr) 1606, 1685, 1716; <sup>1</sup>H-NMR: (CDCl<sub>3</sub>)  $\delta$  3.54 (dd,  $J$  = 4.8 and 13.2 Hz, 1H), 3.62 (dd,  $J$  = 5.4 and 9.0 Hz, 1H), 5.20 (dd,  $J$  = 9.0 and 13.2 Hz, 1H), 5.52 (dd,  $J$  = 4.8 and 5.4 Hz, 2H), 7.0 -7.26 (m, 4H), 7.47-7.54 (m, 4H), 7.92-7.97 (m, 4H); <sup>13</sup>C-NMR (CDCl<sub>3</sub>)  $\delta$  49.2, 52.5, 73.9, 77.2, 118.3, 118.7, 119.4, 122.2, 122.4, 123.4, 127.3, 128.1, 135.6, 136.9, 160.3, 160.8, 187.2, 187.9; EI-MS  $m/z$  292 (M<sup>+</sup>).

Crystal data for the, *cis-cis-anti* head-to-tail dimer **2**, (recrystallized from a mixture of CHCl<sub>3</sub> and hexane): Monoclinic, space group *C2/c*,  $a$  = 14.8002(10) Å,  $b$  = 8.2800(6) Å,  $c$  = 22.2830(19) Å,  $\beta$  = 103.7710(10)°,  $V$  = 2652.2(3) Å<sup>3</sup>,  $Z$  = 8,  $\rho$  = 1.464 Mg m<sup>-3</sup>; 7287 reflections measured, 3007 unique,  $R_{\text{int}}$  = 0.024, in the final least-square refinement cycles on  $F^2$ , the model converged to  $R_1$  = 0.0420,  $wR_2$  = 0.1053. CCDC 714210 contains crystallographic data.

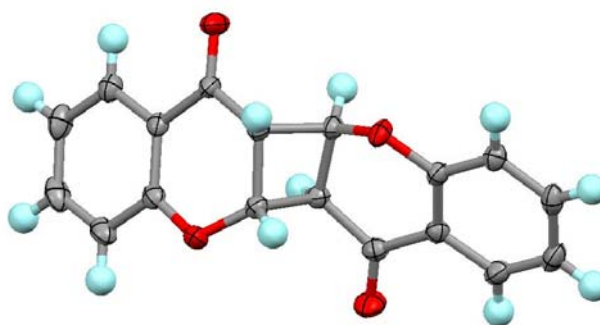

**Figure S1.** Ortep drawing of **2**. The ellipsoids were drawn in 50% probability.

Crystal data for the, *cis-trans* head-to-tail dimer **3**, (recrystallized from a mixture of CHCl<sub>3</sub> and hexane): Monoclinic, space group *P21/c*,  $a$  = 10.5496(13) Å,  $b$  = 10.5496(13) Å,  $c$  = 14.7098(18) Å,  $\beta$  = 98.247(2)°,  $V$  = 1318.2(3) Å<sup>3</sup>,  $Z$  = 4,  $\rho$  = 1.473 Mg m<sup>-3</sup>; 7195 reflections measured, 3043 unique,

$R_{\text{int}} = 0.018$ , in the final least-square refinement cycles on  $F^2$ , the model converged to  $R_1 = 0.0477$ ,  $wR_2 = 0.1260$ . CCDC 714211 contains crystallographic data.

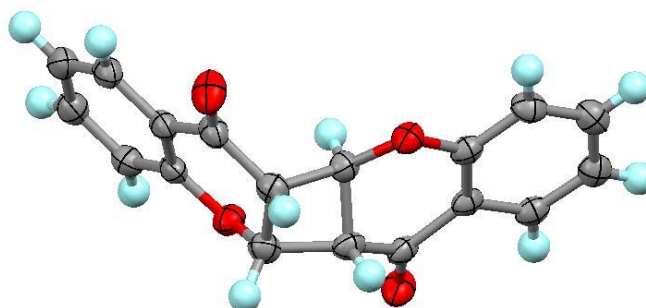

**Figure S2.** Ortep drawing of **3**. The ellipsoids were drawn in 50% probability.

### Spectral changes for the photoreaction of chromone **1**

A 0.1 M benzene solution of chromone was irradiated with a 500-W high pressure mercury lamp under argon atmosphere up to 20 % conversion. Residual mixture containing two dimers and unreacted **1** was diluted to 1000 times with benzene.

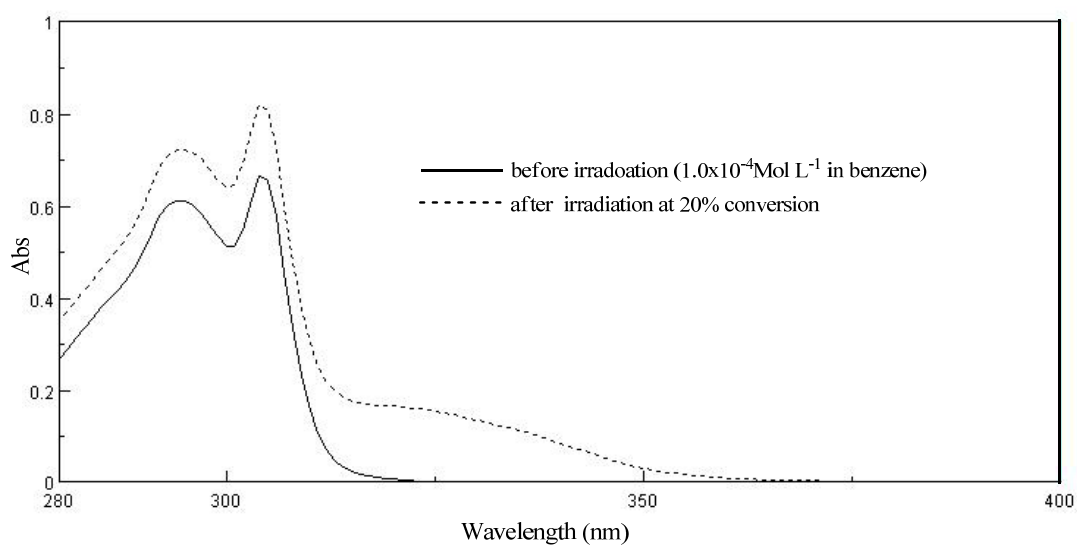

**Figure S3.** UV spectra before and after irradiation of chromone **1**. A benzene solution of **1** ( $1.0 \times 10^{-1} \text{ mol L}^{-1}$ ) was irradiated until 20% conversion.

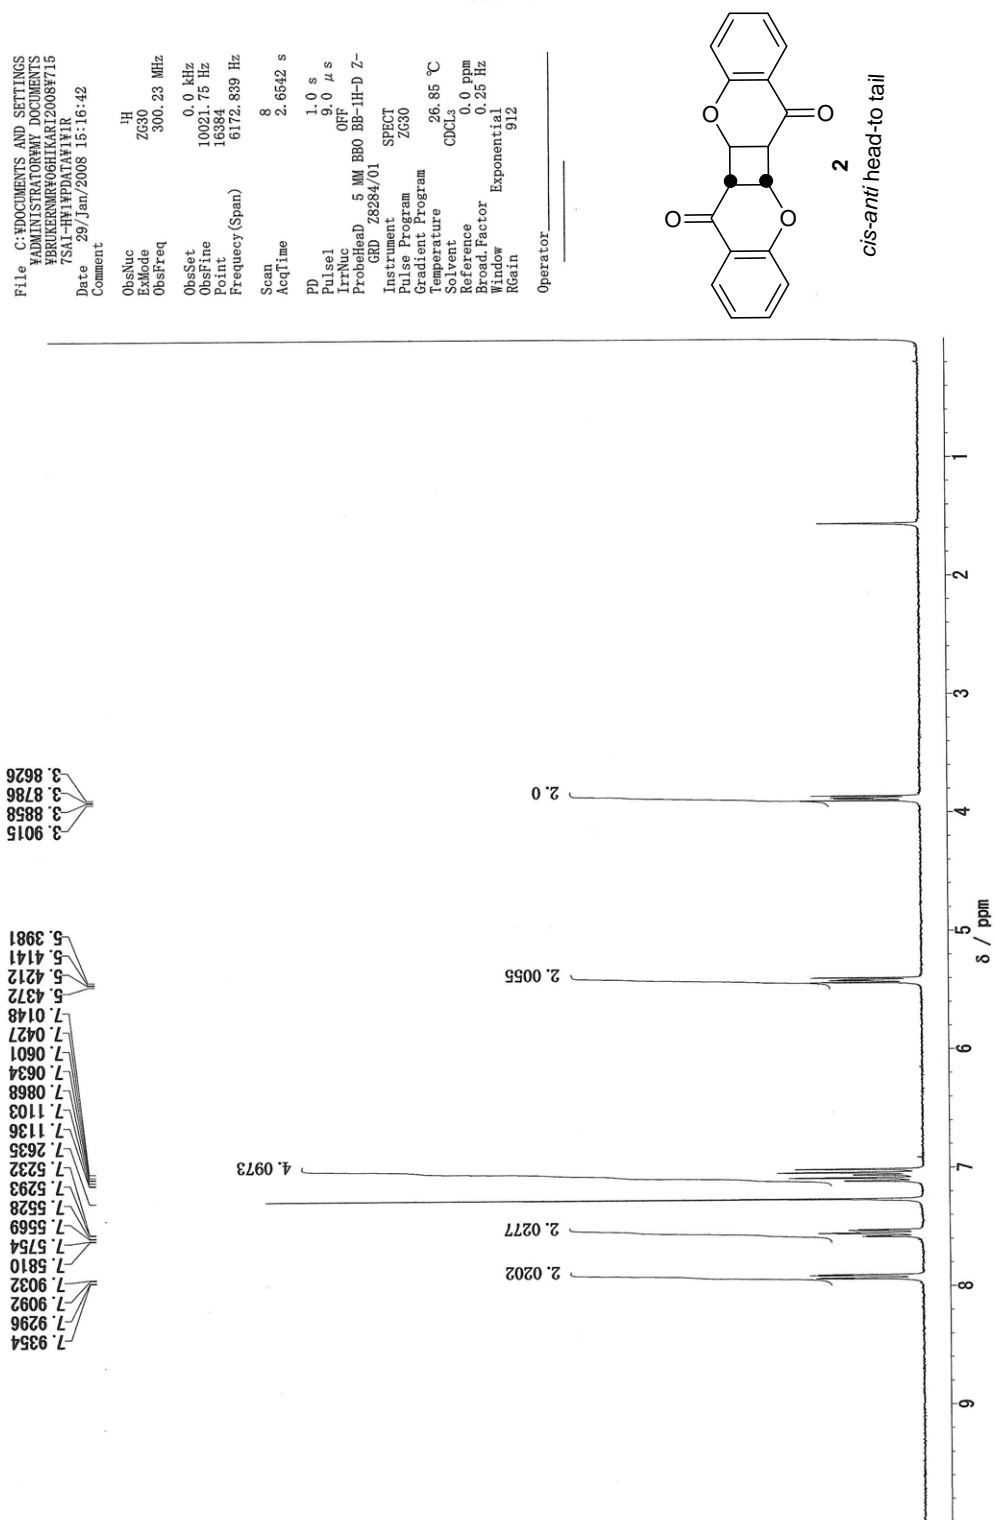

Figure S4. <sup>1</sup>H NMR spectrum of *cis-cis-anti* H-T dimer 2

File C:\DOCUMENTS AND SETTINGS  
ADMINISTRATOR\MY DOCUMENTS  
HRUENR0806\K1R2008\714  
OSAI-C113\DATA\11R  
Date 27/Jan/2008 15:30:08  
Comment

ObsNuc <sup>13</sup>C  
ExpMode ZGPC30  
ObsFreq 75.49 MHz  
ObsSet 0.0 kHz  
ObsFine 10004.79 Hz  
Point 32768  
Frequency (Span) 23809.52 Hz  
Scan 512  
AcqTime 1.3763 s  
PD 2.0 s  
Pulse1 0.0 μs  
IrrNuc OFF  
ProbeHead 5 MM BBO BB-1H-D Z-  
GRD Z8284/01  
Instrument SPECT  
Pulse Program ZGPC30  
Gradient Program  
Temperature 26.85 °C  
Solvent CDCl<sub>3</sub>  
Reference 77.0 ppm  
Broad.Factor 0.25 Hz  
Window Exponential  
RGain 1448

Operator: \_\_\_\_\_

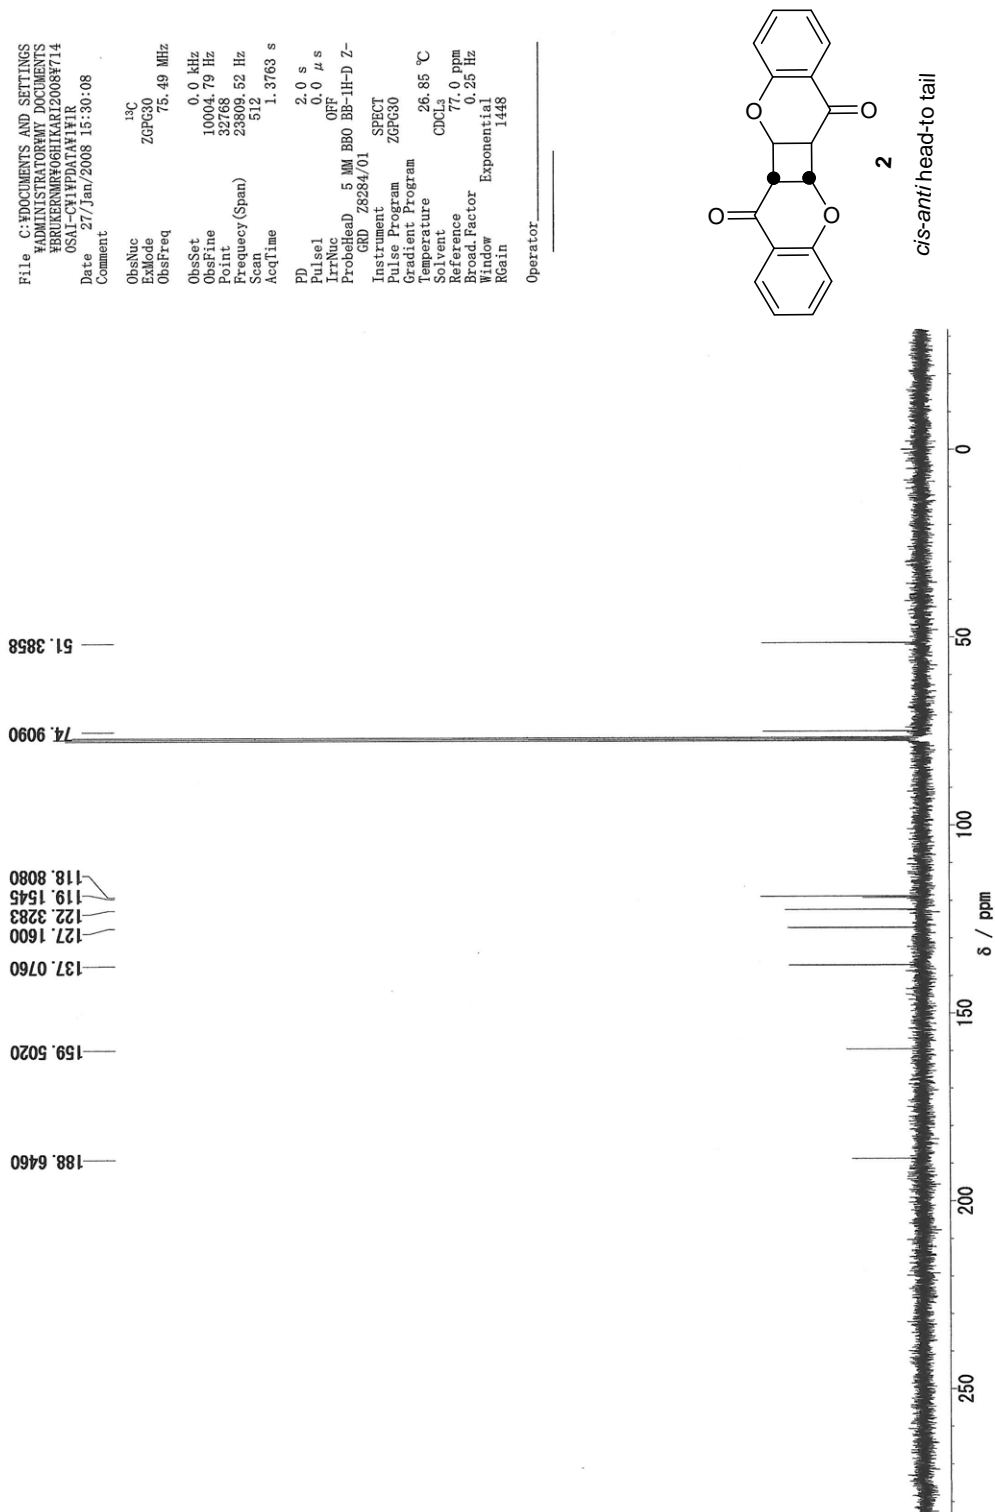

Figure S5. <sup>13</sup>C NMR spectrum of *cis-cis anti* H-T dimer 2

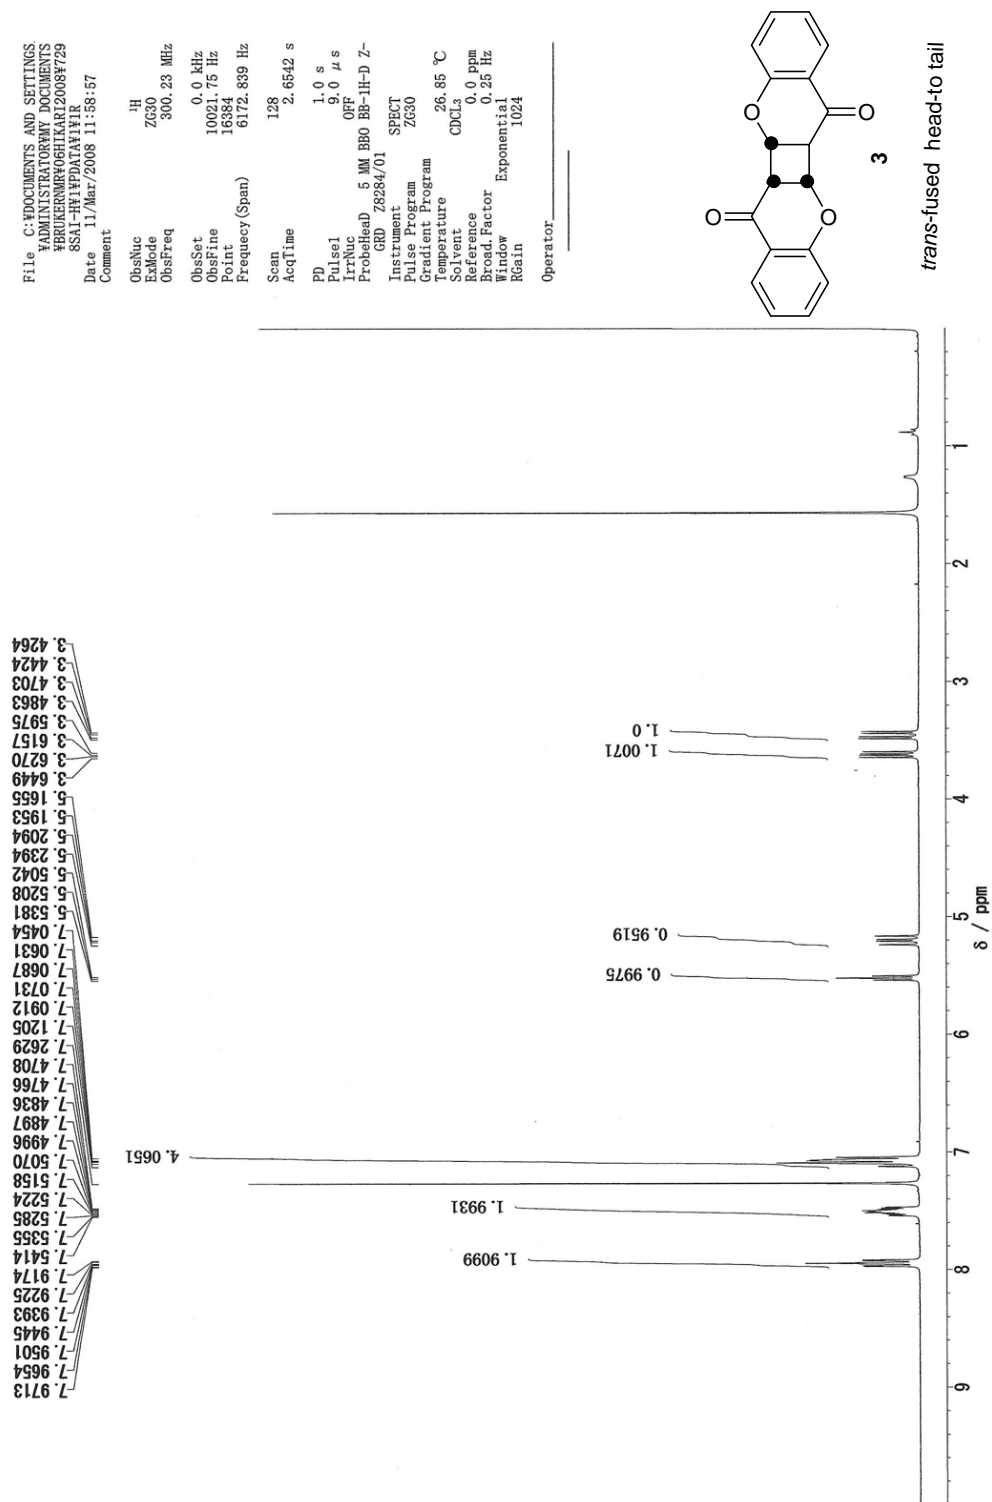

Figure S6. <sup>1</sup>H NMR spectrum of *trans-anti* H-T dimer **3**

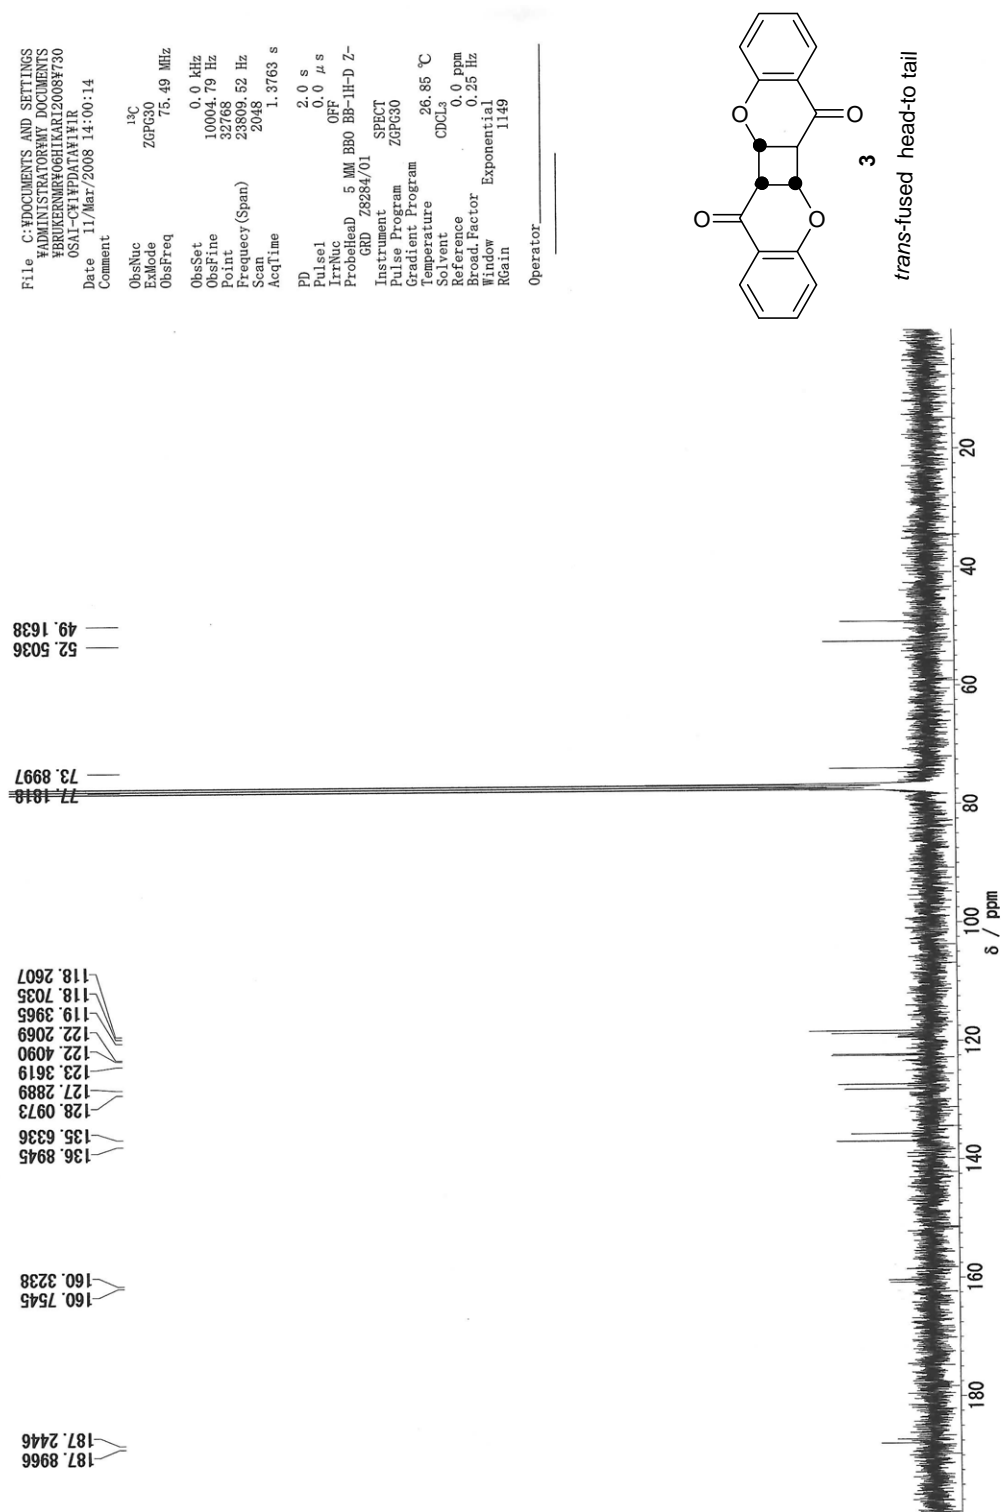

Figure S7. <sup>13</sup>C NMR spectrum of *trans anti* H-T dimer **3**
